# Supplementary material for: Using Whole Slide Gray Value Map to Predict HER2 Expression and FISH Status in Breast Cancer
Source: MDPI journal article supplement (doi:10.3390/cancers14246233), 2022-12-17
Supplement: s1 [file s1]

# Using Whole Slide Gray Value Map to Predict HER2 Expression and FISH Status in Breast Cancer

**Table S1.** HER2 IHC classification performance of GrayMap methods by cross-validation classification in subgroup of 0/1+, 2+ and 3+.

|      | Fold | precision | recall | f1-score | support |
|------|------|-----------|--------|----------|---------|
| 0/1+ | 1    | 1         | 0.333  | 0.5      | 3       |
|      | 2    | 1         | 0.75   | 0.857    | 8       |
|      | 3    | 1         | 1      | 1        | 7       |
|      | 4    | 0.667     | 0.4    | 0.5      | 5       |
|      | 5    | 1         | 0.333  | 0.5      | 3       |
|      | Avg. | 0.933     | 0.563  | 0.671    |         |
|      | Std. | 0.149     | 0.299  | 0.240    |         |
| 2+   | 1    | 0.943     | 1      | 0.971    | 33      |
|      | 2    | 0.941     | 1      | 0.97     | 32      |
|      | 3    | 0.968     | 1      | 0.984    | 30      |
|      | 4    | 0.906     | 0.967  | 0.935    | 30      |
|      | 5    | 0.941     | 1      | 0.97     | 32      |
|      | Avg. | 0.940     | 0.993  | 0.966    |         |
|      | Std. | 0.022     | 0.015  | 0.018    |         |
| 3+   | 1    | 1         | 1      | 1        | 10      |
|      | 2    | 1         | 1      | 1        | 6       |
|      | 3    | 1         | 0.889  | 0.941    | 9       |
|      | 4    | 1         | 1      | 1        | 10      |
|      | 5    | 1         | 1      | 1        | 10      |
|      | Avg. | 1.000     | 0.978  | 0.988    |         |
|      | Std. | 0.000     | 0.050  | 0.026    |         |

**Table S2.** HER2 FISH prediction performance of GrayMap methods on subgroup of 0/1+, 2+ and 3+.

|      | precision     | recall        | f1            | jaccard       | accuracy      | specificity   |
|------|---------------|---------------|---------------|---------------|---------------|---------------|
| 0/1+ | 1.000 ± 0.000 | 0.333 ± 0.250 | 0.500 ± 0.333 | 0.333 ± 0.250 | 0.941 ± 0.056 | 1.000 ± 0.000 |
| 2+   | 0.868 ± 0.072 | 0.836 ± 0.067 | 0.852 ± 0.050 | 0.742 ± 0.075 | 0.895 ± 0.034 | 0.928 ± 0.045 |
| 3+   | 1.000 ± 0.000 | 1.000 ± 0.000 | 1.000 ± 0.000 | 1.000 ± 0.000 | 1.000 ± 0.000 | ---           |
